# 1 **Role of Ori in *Thermococcus barophilus***

2

3 Yann Moalic<sup>1</sup>, Ryan Catchpole<sup>2</sup>, Elodie Leroy<sup>1</sup>, Logan Mc Teer<sup>1</sup>, Valérie Cueff-Gauchard<sup>1</sup>,  
4 Johanne Aubé<sup>1</sup>, Yang Lu<sup>1</sup>, Erwan Roussel<sup>1</sup>, Jacques Oberto<sup>2</sup>, Didier Flament<sup>1</sup> and Rémi  
5 Dulermo<sup>1\*</sup>

6

7 <sup>1</sup>Univ Brest, Ifremer, CNRS, Laboratoire de Microbiologie des Environnements Extrêmes, F-  
8 29280 Plouzané, France.

9 <sup>2</sup>Université Paris-Saclay, CEA, CNRS, Institute for Integrative Biology of the Cell (I2BC),  
10 91198, Gif-sur-Yvette, France.

11

12

13 \*Corresponding author; Tel: +33298224398; Email: [remi.dulermo@ifremer.fr](mailto:remi.dulermo@ifremer.fr)

14

15

16

17

18

19

20 Keywords: *Thermococcus kodakarensis*, Ori, RDR, Recombination-dependent replication,  
21 DNA replication

22

23

24

25 **Summary**

26

27 The mechanisms underpinning replication of genomic DNA in Archaea have recently been  
28 challenged. Species belonging to two different taxonomic orders grow well in the absence of  
29 an origin of replication, challenging the role of the replication origin in these organisms. Here,  
30 we pursue the investigation of the particular way some archaea manage their DNA replication  
31 with *Thermococcus barophilus* and the role of Ori in this Archaea. Surprisingly we discovered  
32 that *T. barophilus* uses its Ori all along the growth curve with marked increase at the end of  
33 exponential phase. Through gene deletion, we show that Ori utilization requires Cdc6, and that  
34 origin deletion results in increased time in lag phase and a moderate decrease of growth rate in  
35 mutants. The number of chromosomes are quite similar between both strains during exponential  
36 and early stationary phases but differs after 24h of growth where  $\Delta\text{TbOriC}$  has only 6  
37 chromosomes/cell compared to 10 for the reference strain (WT). Following 1hr of growth in  
38 fresh media,  $\Delta\text{TbOriC}$  strains contains 3 chromosome copies/cell, whereas the WT contains  
39 only 1. We hypothesize that the *T. barophilus* might degrade DNA to obtain energy to start  
40 replication and cell division, whereas the  $\Delta\text{TbOriC}$  must maintain more chromosomal copies in  
41 order to initiate DNA replication in the absence of an origin or replication. Finally, we analyzed  
42 the role of Ori at temperatures above or below the optimal temperature, revealing that Ori is  
43 important to start growth at those temperatures, suggesting that replication origins may be  
44 involved in stress response.

45

## 46 Introduction

47

48 DNA replication is an essential process for all cells, facilitating the duplication of DNA  
49 before cell division. This process begins by the recognition of a specific DNA sequence (Ori)  
50 by an initiator protein which promotes opening of the DNA double helix. This role is played by  
51 DnaA in Bacteria and Orc1/Cdc6 in Archaea (Leonard and Méchali, 2013). In general, Bacteria  
52 have only one Ori sequence (Gao, 2015) whereas up to four have been identified in some  
53 Archaea. Indeed, the Archaeal species *Pyrococcus abyssi* and *Nitrosopumilus maritimus* have  
54 only one chromosomal replication origin whereas *Sulfolobus acidocaldarius* and *Sulfolobus*  
55 *solfataricus* have three, and *Pyrobaculum calidifontis* has four (Myllykallio et al., 2000;  
56 Lundgren et al., 2004; Robinson et al., 2004; Pelve et al., 2012; Pelve et al., 2013).

57 It was recently shown that origins of replication are not always essential in Archaea; the  
58 four origins of *Haloferax volcanii* (DS2 strain) and the single origin of *Thermococcus*  
59 *kodakarensis* can be deleted (Hawkins et al., 2013; Gehring et al., 2017). A slight increase of  
60 growth rate was even observed for the multiple Ori depleted strain of *H. volcanii* questioning  
61 the role and maintenance of these origins (Hawkins et al., 2013). In the *T. kodakarensis* Ori  
62 depleted strain, while growth rates were unaffected, a loss of long-term viability was observed  
63 (Gehring et al., 2017). However, not all Archaea tolerate the loss of Ori as was shown for  
64 *Haloferax mediterraneii* which must conserve at least one origin of replication to be viable  
65 (Yang et al., 2015). Similarly, the Ori-binding protein Cdc6 can be removed in *T. kodakarensis*  
66 (Gehring et al., 2017), just as *DnaA* can be removed in cyanobacteria (Ohbayashi et al., 2016);  
67 whereas it is not possible to delete all *cdc6*-encoding genes from *H. volcanii* (H26 strain), with  
68 some remaining essential (Ludt and Soppa, 2018). Several mechanisms have been proposed  
69 and studied for the initiation of replication which are independent of Cdc6/DnaA e.g. rolling  
70 circle replication of plasmids by Rep proteins (Ruiz-maso et al. 2015); iSDR (inducible Stable  
71 DNA Replication) and cSDR (constitutive Stable DNA Replication) (Kogoma, 1997; Michel  
72 and Bernander, 2014). iSDR is a particular form of Recombination-Dependent-Replication  
73 (RDR) induced in *E. coli* during the SOS response, initiating chromosomal replication from D-  
74 loops (intermediates in homologous recombination). In contrast, cSDR occurs in RNaseH  
75 mutants of *E. coli*, where RNA transcripts invade the DNA duplex creating an R-loop sufficient  
76 to initiate replication. Both iSDR and cSDR function independently of specific Ori sequences,  
77 of protein synthesis, and of DnaA, though both require homologous recombination proteins  
78 such as RecA and PriA (Kogoma, 1997; Michel and Bernander, 2014). However, it was  
79 proposed that recombination-dependent replication (RDR) could be used in *H. volcanii* since

80 *RadA* became essential in the strain deleted of all four Ori (Hawkins et al., 2013). RDR was  
81 first discovered during replication of T4 phage and functions by the use of loops formed after  
82 strand invasion to initiate replication of DNA. It was shown that homologous recombination  
83 proteins of T4 phage are essential to perform this function (Kreuzer and Brister 2010). The  
84 ability of some species to survive without Ori raises many questions, such as the mechanism by  
85 which replication occurs in the absence of functional origins, why the origin is maintained when  
86 non-essential, and why there is disparity in the essential/non-essential nature of origins between  
87 species. Clearly, DNA replication in *Archaea* remains mysterious in many aspects.

88 In order to better understand the role of Ori in different aspects of Archaeal growth we  
89 used the anaerobic and piezophilic Archaeon, *Thermococcus barophilus* MP. This Euryarchaeal  
90 species was isolated from hydrothermal vents (Marteinsson et al. 1999) and is genetically  
91 tractable (Thiel *et al.* 2014; Birien et al., 2018). We reveal that this archaeon uses its Ori mainly  
92 during the end of exponential phase and the beginning of stationary phase and that, despite this  
93 clear Ori use, *Cdc6* and Ori are non-essential. Analyses of chromosome numbers in WT and  
94 Ori-deletion strains show that Ori and ploidy are somehow linked, most markedly during early  
95 and late phases of growth. Our results suggest that Ori-utilizing strains resume growth (from  
96 stationary phase) more rapidly than Ori-deletion strains, and that this growth resumption is  
97 accompanied by a marked decrease in chromosome number. We hypothesize that the  
98 polyploidy of *T. barophilus* can be used as an internal energy store to facilitate growth upon  
99 nutrient availability. Additionally, we identify temperature-sensitive growth defects of Ori  
100 deleted strains, suggesting a role of Ori in stress response.

101

## 102 **NGS read mapping shows activation of OriC in some *Thermococcus***

103 Recent work has shown that the chromosomal origin of replication (OriC) is non-  
104 essential in the archaeon, *T. kodakarensis* (Gehring et al. 2017). Not only can OriC and *Cdc6*  
105 be deleted from *T. kodakarensis*, but no evidence of OriC activation is visible when short-read  
106 sequencing data is mapped to the chromosome. To assess whether this characteristic is shared  
107 by other *Thermococcales*, we mapped Illumina sequencing reads to the genomes of *T.*  
108 *barophilus* and *Thermococcus sp. 5-4*, using *T. kodakarensis* as a control (Fig. 1). For  
109 simplicity, the genetic strain  $\Delta$ TERMP\_00517 used in this paper, it will be called referred to as  
110 wild-type (WT). Marker frequency analysis (MFA) shows a weak but not absent use of Ori for  
111 *T. kodakarensis* with a slight preference to use Ori during the stationary phase (Fig. 1A). This  
112 contrasts with previous work (Gehring et al. 2017) where no Ori use was found, though this is  
113 perhaps explainable by the weak signal observed in our analyses. MFA for *T. sp. 5-4* and *T.*

114 *barophilus* revealed also the use of one Ori at both growth phases but preferentially in stationary  
115 phase (Fig. 1B and C). To our knowledge, this is the first time that Ori-dependent replication  
116 was found to be used mainly during stationary phase, rather than in exponential phase when  
117 DNA replication is expected to mirror cell division.  
118

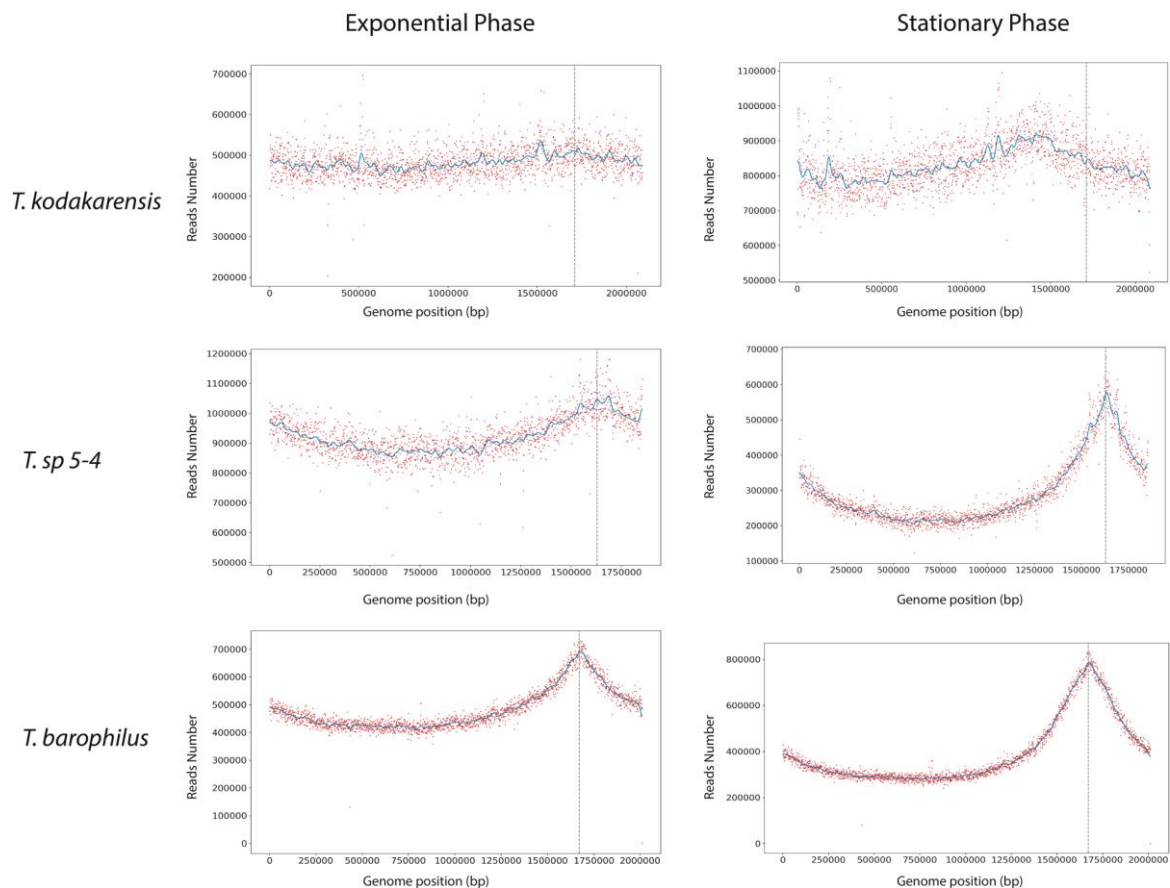

119  
120 Figure 1: Marker Frequency Analysis of *T. kodakarensis* and *T. sp. 5-4*, *T. barophilus* genomes. (A) Mapping of  
121 Illumina read data to the genomes of *T. kodakarensis* during exponential and stationary phases. (B) Mapping of  
122 Illumina read data to the genomes of *T. sp. 5-4* during exponential and stationary phases. (C) Mapping of Illumina  
123 read data to the genomes of *T. barophilus* during exponential and stationary phases. The blue lines represent the  
124 one dimension Gauss filter. Vertical dotted lines represent canonical Ori position.

125

### 126 Which Ori is used in *T. kodakarensis*, *T. sp 5-4* and *T. barophilus*

127 To localize more precisely the Ori in the 3 species Ori-Finder 2 (Luo et al., 2014) was  
128 used to determine the potential Ori sequences. Ori-Finder 2 predicted 3 potentials Ori in *T.*  
129 *kodakarensis*, one localized at 1349201-1349821 (TkOriC1, 2 mini-ORBs; Suppl. Fig. 1A), a  
130 second at 1482592-1484232 (TkOriC2, 6 mini-ORBs, Suppl. Fig. 1B) and a third localized at  
131 1711251-1712157 (TkOriC3, 22 mini-ORBs, Suppl. Fig. 1C) adjacent to the *cdc6* gene,  
132 corresponding to the Ori found by Matsunaga et al. (2007). *Cdc6* is involved in replication

133 initiation and often found adjacent to the Ori of *Thermococcales* (Ojha and Swati, 2010; Cossu  
134 et al. 2015). The first and/or second predicted Ori could be that observed to be active in our  
135 MFA.

136 Ori-Finder 2 found 3 potential Ori for *T. sp* 5-4, at position 1417313-1419615 (5 mini-  
137 ORBs, Suppl. Fig. 1D), 1629851-1630129 and 1631511-1632186 (4 and 16 mini-ORBs, Suppl.  
138 Fig. 1E). The last two are close to *cdc6* gene. These both positions likely correspond to the  
139 active Ori as their coordinates are consistent with the position of the peak observed in MFA  
140 (Fig. 1B).

141 In *T. barophilus*, the software predicted two potential origins of replication, at positions  
142 1333666-1334901 (3 mini-ORBs, Suppl. Fig. 1F) and 1672620-1673707 (20 mini-ORBs,  
143 Suppl. Fig. 1G). The latter position (TbOriC) is close to the gene encoding Cdc6 (TbCdc6).  
144 Moreover, this position likely corresponds to the active Ori as the coordinates of TbOriC are  
145 consistent with the position of the peak observed in MFA (Fig. 1C).

146 Our data show that Ori prediction are still complicated in *Thermococcus* and that Ori  
147 can be found sometimes far from *cdc6* gene. All of this suggest that more effort should be done  
148 to understand how replication initiates in *Thermococcales*.

149

### 150 ***T. barophilus* Ori and *cdc6* deletion mutants are viable**

151 It has been shown previously that the origin of replication is not essential for viability  
152 in some *Archaea* e.g. *Haloferax volcanii* (Hawkins et al., 2013) and more recently in *T.*  
153 *kodakarensis* (Gehring et al., 2017). Accordingly, TkCdc6 is also not necessary for viability in  
154 *T. kodakarensis* (Gehring et al., 2017). In apparent conflict with these results, it was shown that  
155 *Haloferax mediterraneii* must conserve at least one origin of replication to be viable (Yang et  
156 al., 2015). To determine whether the identified origin of replication and *Tbcd6* are dispensable  
157 in *T. barophilus*, TbOriC and *Tbcd6* were deleted. Interestingly, both could be deleted, without  
158 a strong impact on the growth rate of the strain (Fig. 2A). Sequencing of the mutants shows that  
159 they do not contain copies of TbOriC and *TbCdc6*. The doubling time did increase around 18%  
160 (75 min for  $\Delta$ TERMP\_00517 to 89 min for  $\Delta$ *cdc6* and  $\Delta$ *OriC1*) and a longer lag time was  
161 observed (around 6h compared with 3h for WT). In addition, MFA showed that both the TbOriC  
162 and *TbCdc6* mutant strains no longer use a detectable Ori (Fig. 2B-E), indicating that TbOriC  
163 is the sole Ori used in *T. barophilus* and that it is activated by *Tbcd6*. The viability of *T.*  
164 *barophilus* in the absence of *Tbcd6* was similar to that observed for *T. kodakarensis* (Gehring  
165 et al. 2017) and *H. volcanii* (Hawkins et al. 2013), and suggests an alternative pathway to

166 initiate DNA replication. This alternative pathway might be mainly observed during the early  
167 exponential phase in WT (when TbOriC is weakly used) and at all sample points for  $\Delta$ TbOriC.  
168

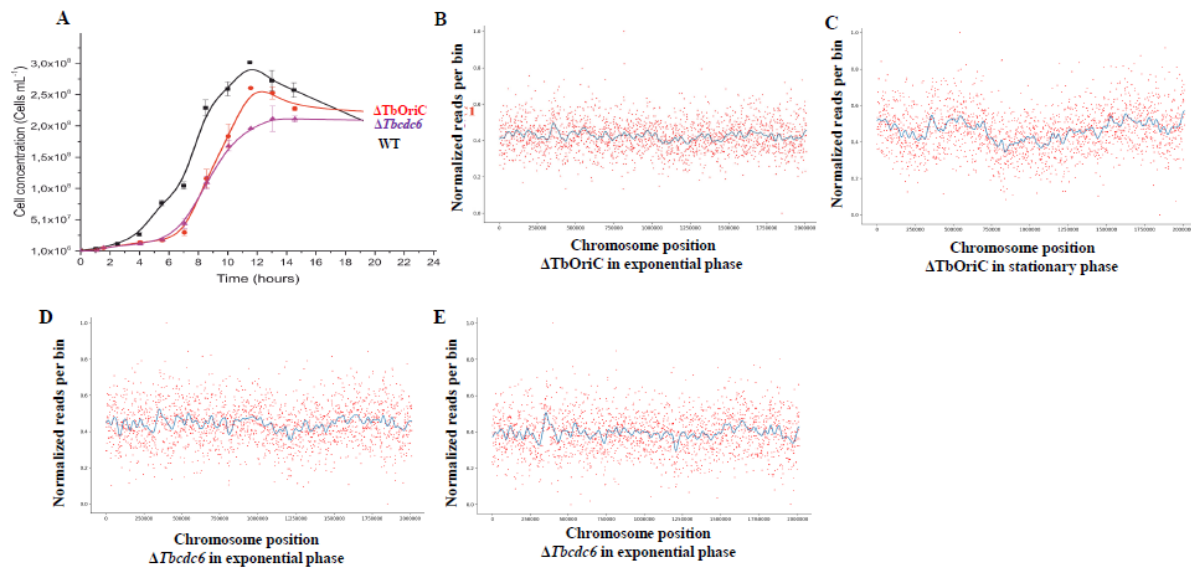

169  
170 Figure 2: Phenotypes associated with the deletion of *Tbcd6* and TbOriC. (A) Growth curve of WT,  $\Delta$ TbOriC and  
171  $\Delta$ Tbcd6 strains. The data presented here are the average of three independent experiments with error bars  
172 representing standard deviation. (B and C) MFA of *T. barophilus* strains in the absence of TbOriC (B and C) and  
173 *Tbcd6* (D and E) in exponential (B and D) and stationary phase showing loss of origin usage. The blue lines  
174 represent the one dimension Gauss filter.

175

### 176 **Link between Ori utilization and chromosome copy number.**

177 To understand how the Ori is activated during growth, we performed MFA on genomic  
178 DNA isolated at different phases of growth from both WT and  $\Delta$ TbOriC strains (Fig. 3, 4A and  
179 suppl. Fig. 2). These analyses revealed that WT increasingly utilizes its origin between the  
180 middle of the exponential phase to the stationary phase (Fig. 3 and 4B). Interestingly, following  
181 transfer to fresh media, we observe a loss of the sharp Ori-utilization peak, with that observed  
182 at 4h representing only one fourth of the Ori-dependent replication seen at 1h (Fig. 4B and  
183 Suppl. Fig. 2A). Moreover, the width of the Ori peak remains almost stable during the  
184 exponential phase (4h to 9.33h of growth, Suppl. Fig. 3), suggesting that most of cells increase  
185 Ori opening during this time. This is also correlated with the peak shape that increase in height  
186 and has the most pointed shape at 9.33h (Fig. 3), suggesting the highest Ori utilization. During  
187 stationary phase, the shape of MFA patterns changes, becoming more round and wider, likely  
188 as the Ori-initiated replication propagate around the chromosomes. It is difficult to say whether  
189 non-Ori-dependent mechanisms of replication (e.g. RDR) are also occurring in these conditions  
190 as these give no signal in MFA; however, parallel experiments showed no Ori activation in

191  $\Delta$ TbOriC suggesting another replication mechanism must be at play (Fig. 3, 4B and Suppl. Fig.  
192 2B).

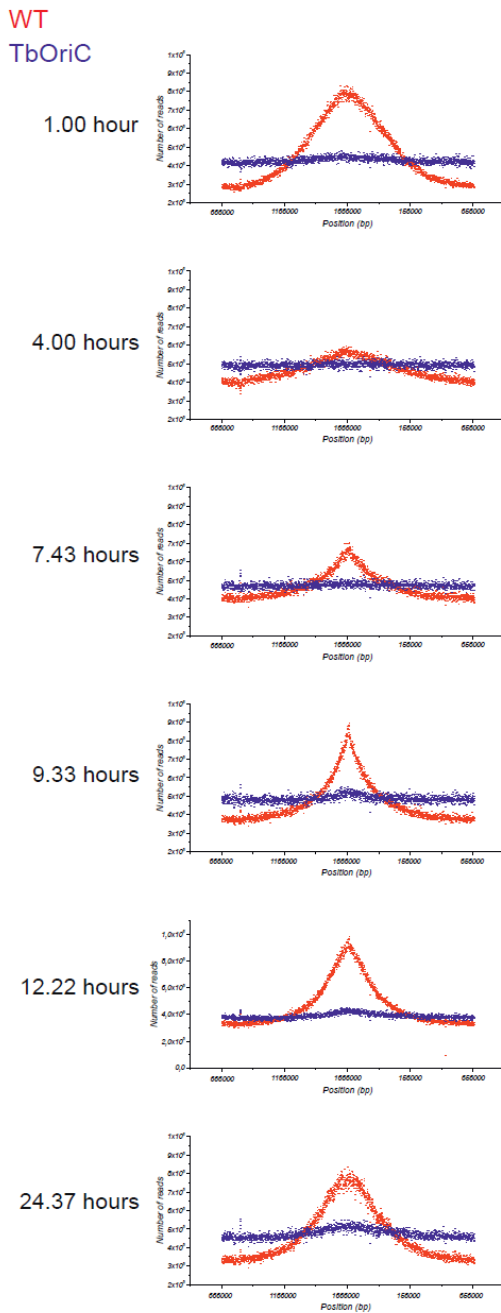

193  
194 Figure 3: Marker Frequency Analysis of *T. barophilus* WT (red) and  $\Delta$ TbOriC (blue) strains the long of growth  
195 curve.

196



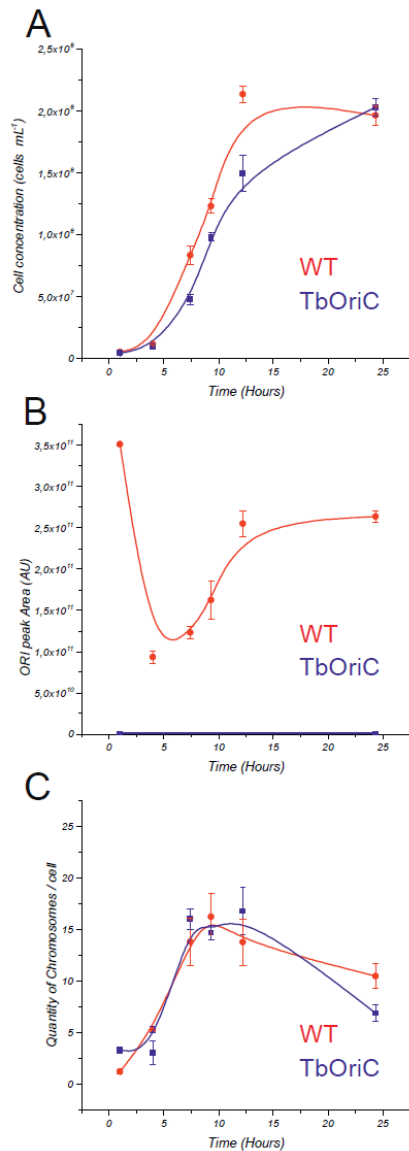

197  
198 Figure 4: Comparison of Ori peak area and chromosomes number the long of the growth curves of WT and  
199  $\Delta$ TbOriC. (A) Growth curve, (B) Ori peak area and (C) chromosomes number of WT (red) and  $\Delta$ TbOriC (blue).  
200 The data presented here are the average of three independent experiments with error bars representing standard  
201 error.

202  
203 To understand better how ploidy of *T. barophilus* evolves during growth, qPCR was  
204 performed on the *RadA* locus in WT and  $\Delta$ TbOriC strains (Fig. 4C, Suppl. Fig. 2). Similarly to  
205 a previous publication in *Thermococcales* (Spaans et al., 2015), we found that WT contained  
206 around 14-16 chromosomal copies during exponential phase and 10-13 during stationary phase  
207 (Fig. 4C and Suppl. Fig. 2A). This number was globally similar for  $\Delta$ TbOriC strain during the  
208 exponential phase (around 7h-12h of the growth curve) (Fig. 4C and Suppl. Fig. 2B). However,  
209 some discrepancies are observable. Indeed, at 1h of growth, only one chromosome per cell was  
210 found in the WT ( $1.23 \pm 0,16$ ) and this correlated with a peak in MFA (Suppl. Fig. 3A) and a

211 short lag phase (Fig. 2). In contrast, around three chromosomes per cell were found in  $\Delta$ TbOriC  
212 ( $3.29 \pm 0,32$  chromosomes per cell) suggesting a difference in ploidy regulation or a  
213 requirement of polyploidy for growth in the absence of Ori. It is surprising that the number of  
214 chromosomes of the WT strain decreased from 10 during stationary phase ( $10,46 \pm 1.22$ ) to one  
215 following 1h of incubation in fresh media. We also found that the Ori is necessary to maintain  
216 a higher ploidy during stationary phase with Ori deleted strain since it contains only six  
217 chromosome per cell at 24h of growth ( $6,86 \pm 0.8$ ), compared with 10 of WT. To better  
218 understand the rates of chromosome change in both strains we analyzed the ratios of cells and  
219 chromosome number between each time point (Suppl. Fig. 2C). As explained above we could  
220 see that at the beginning of the growth, during the 4 first hours, chromosome number per cell  
221 increased faster than cell number, showing that at that time WT cells accumulated  
222 chromosomes. This contrasts with the  $\Delta$ TbOri strain where chromosome number stayed  
223 constant. During early exponential phase (4h to 7,43h), the ratio of cell numbers increased 7.3  
224 times, faster than the chromosome numbers ratio (2.6 times) in WT, and this without the use of  
225 full activated Ori. Again,  $\Delta$ TbOriC strain behaved differently, with cell number and  
226 chromosome number per cell increasing similarly, around 5 times. In middle to late exponential  
227 phase (7,43h to 9,33h; 9,33h to 12,22h) we observed a stabilization of chromosome number per  
228 cell ratio in both strains whereas, cells number ratios increased slowly. Finally, we could see  
229 that between 12,22h to 24,37h, the ratio of chromosome number per cell was below 1, showing  
230 a decreasing ploidy. These results suggest that the Ori is important to maintain a higher  
231 chromosome number per cell, and perhaps the ability to replicate a single chromosome (Ori-  
232 deletion strains never reach  $n=1$ ). Additionally, a marked reduction in chromosome number  
233 seems to correlate with restoration of growth from stationary phase (exit from lag phase).

234

### 235 **Role of TbOriC at sub- and supra-optimal temperatures**

236

237 *T. barophilus* was described as being able to grow from 48 to 100°C, however, 95°C is  
238 the maximum at atmospheric pressure (Martteinson et al., 1999). To understand the role of Ori  
239 in *T. barophilus* under non-optimal conditions, we analyzed growth of WT,  $\Delta$ TbOriC strains at  
240 65 and 95°C (Fig. 5). As expected, growth rate at those temperatures is lower than at the optimal  
241 temperature of 85°C. Generation time for WT is around  $162 \pm 22$  min at 95°C and  $494 \pm 16$   
242 min at 65°C (Fig. 5), compared to 75 min at 85°C. Surprisingly, growth of  $\Delta$ TbOriC was  
243 strongly affected at both 65 and 95°C, not only during the lag phase (as observed at 85°C) but  
244 throughout growth, with generation time increased 1.7 time at 95°C ( $274 \pm 23$ ) and around 1.33

245 at 65°C (657 ± 77 min). This shows clearly that even if growth was not greatly affected by the  
246 deletion of Ori at 85°C, this deletion strongly affected growth at 65 and 95°C. The dispensibility  
247 of Ori at optimal temperature in *H. volcanii*, *T. kodakarensis* or in *T. barophilus*, might suggest  
248 variation in environmental conditions to be a reason explaining maintenance of Ori and Cdc6  
249 in *T. barophilus*. It remains to be tested whether similar growth defects arise in other species.  
250

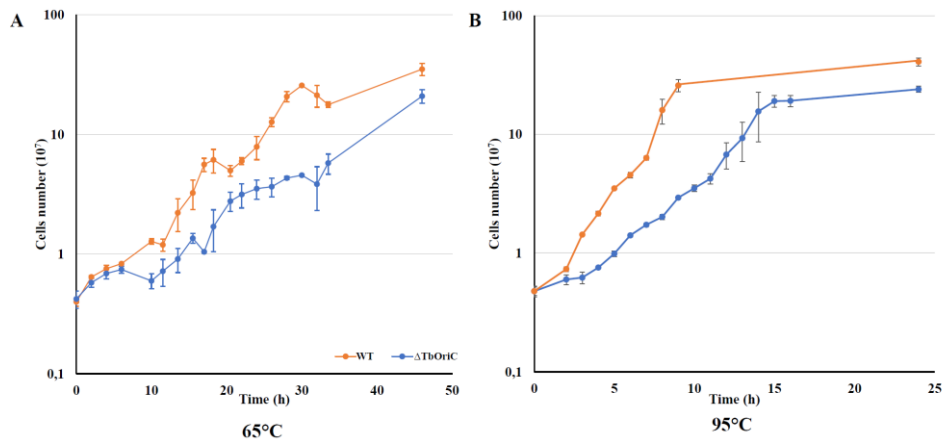

251  
252 Figure 5: Growth curves at sub and supra-optimal temperature of WT and  $\Delta$ TbOriC. (A) Growth at 65°C. (B)  
253 Growth at 95°C. The data presented here are the average of three independent experiments with error bars  
254 representing standard deviation.

255

256

## 257 Discussion

258 Here, we analyzed the role of Ori in *T. barophilus* and found that, in contrast to that  
259 known for *T. kodakarensis* (Gehring et al. 2017), a chromosomal origin of replication is used  
260 for DNA replication. Surprisingly, this Ori was active mainly during late exponential to early  
261 stationary phase. Additionally, we were able to identify subtle Ori use in *T. kodakarensis*,  
262 suggesting Ori use may be a regulated process in *Thermococcales* occurring under specific  
263 growth conditions.

264 We were surprised to see that *T. barophilus* use one fourth to one half of the maximal  
265 Ori utilization during most of exponential phase growth (results are summarized in Table 1),  
266 raising the question about the replication mode of DNA during this phase. Moreover, the  
267 functional Ori of *T. barophilus* was dispensable, along with the associated replication initiator,  
268 Cdc6.

269

270 Table 1: Summary of results

| WT                             | 1h                   | 4h                   | 7.43h                | 9.33h                | 12.22h               | 24.37h               |
|--------------------------------|----------------------|----------------------|----------------------|----------------------|----------------------|----------------------|
| <b>Ori utilisation</b>         | 3.5 10 <sup>11</sup> | 9.3 10 <sup>10</sup> | 1.2 10 <sup>11</sup> | 1.6 10 <sup>11</sup> | 2.6 10 <sup>11</sup> | 2.6 10 <sup>11</sup> |
| <b>Chromosome numbers/cell</b> | 1.23                 | 5.28                 | 13.8                 | 16.21                | 13.77                | 10.46                |
| <b>Cell number/mL</b>          | 5.1 10 <sup>6</sup>  | 1.1 10 <sup>7</sup>  | 8.3 10 <sup>7</sup>  | 1.2 10 <sup>8</sup>  | 2.1 10 <sup>8</sup>  | 2 10 <sup>8</sup>    |
| <b>ΔTbOriC</b>                 | 1h                   | 4h                   | 7.43h                | 9.33h                | 12.22h               | 24.37h               |
| <b>Ori utilisation</b>         | No                   | No                   | No                   | No                   | No                   | No                   |
| <b>Chromosome numbers/cell</b> | 3.29                 | 3.04                 | 16                   | 14.69                | 16.78                | 6.87                 |
| <b>Cell number/mL</b>          | 4.4 10 <sup>6</sup>  | 9.58 10 <sup>6</sup> | 4.8 10 <sup>7</sup>  | 9.8 10 <sup>7</sup>  | 1.5 10 <sup>8</sup>  | 2 10 <sup>8</sup>    |
| <b>Temperature</b>             | 65°C                 |                      | 85°C                 |                      | 95°C                 |                      |
|                                | Lag phase            | Growth rate          | Lag phase            | Growth rate          | Lag phase            | Growth rate          |
| <b>WT</b>                      | < 2h                 | 494 min              | < 3h                 | 75 min               | < 2h                 | 162 min              |
| <b>ΔTbOriC</b>                 | < 2h                 | 657 min              | 6h                   | 89 min               | 3h                   | 274 min              |

271

272

273

274

275

276

277

278

279

280

281

282

283

284

285

286

287

288

289

290

291

292

We show that the presence of a functional Ori correlates with reduced lag phase, increased chromosome number per cell, and an improved ability to grow at different temperatures, especially at sub- and supra-optimal temperatures (Table 1). At optimal growth temperature, WT strains appear to rapidly degrade existing chromosomes, decreasing ploidy from around 10/cell in stationary phase to 1/cell following 1h in fresh media. While the cause and significance of this is unknown, it is easy to speculate that such a liberation of resources might facilitate rapid restoration of growth from the stationary phase state. In contrast, cells deleted of the Ori (and/or *cdc6*) are unable to achieve such chromosome losses, harboring only 6-7 chromosomes during stationary phase, and 3 following introduction to fresh media, perhaps resulting in their elongated lag phase relative to WT. It was unexpected to find that at the beginning of the culture, a described polyploid species contains only 1 chromosome per cell. While this is a transient phase, we believe it significant as it is difficult to imagine how DNA replication can proceed from an n=1 state in the absence of an Ori sequence.

All of our data suggest that Ori is important to reduce lag phase, may be by improving preparation of cell for division using DNA as energy stock. In this regard, catabolic pathways exist in *Thermococcales* from which dCTP and dTTP could easily provide substrates for the pentose phosphate pathway or amino acid biosynthesis, for example (Suppl. Fig. 4). For dATP and dGTP, it may also be possible (Suppl. Fig. 4). To prove this hypothesis, more experiments, especially metabolomics, should be performed.

During early exponential growth phase we found that the WT strain does not appear to replicate DNA through an Ori-dependent mechanism (or at least not solely through such a

293 mechanism), with MFA showing a loss of signal at the Ori locus. Despite this, chromosome  
294 number per cell continues to increase, suggesting that a potent Ori-independent pathway (e.g.  
295 RDR) is sufficient to rapidly replicate DNA. In contrast,  $\Delta$ TbOriC cannot use Ori to replicate  
296 DNA and thus must rely upon Ori-independent mechanisms. It seems that such mechanisms  
297 are not as efficient as Ori-dependent pathways to replicate chromosomes and generate a  
298 decrease of growth rate observed in Ori deleted strain, especially at 65 and 95°C and to a lesser  
299 extend at 85°C. We can see also in our results that Ori-independent mechanisms are not efficient  
300 at maintaining high chromosomal copy number in stationary phase, since ploidy decreases more  
301 rapidly than in WT strains. This is in accordance with results found by Gehring et al. (2017)  
302 where they observed a decrease of viability of  $\Delta$ TkOri  $\Delta$ Tkcdc6 strain when stationary phase is  
303 lengthened.

304 We hypothesize that *Thermococcales* are capable of replicating chromosomes via [at  
305 least] two different mechanisms. Upon introduction to fresh media, chromosomes can be  
306 degraded and used as a fast source of nutrients to rapidly restore growth. If such chromosome  
307 degradation results in an n=1 state, Ori-dependent pathways are required for chromosome  
308 replication (assuming the presence of an Ori and associated cdc6). Once ploidy reaches  
309 sufficient levels, Ori-independent pathways can proceed and rapidly replicate DNA. Once  
310 nutrient density begins to decrease (late exponential/early stationary phase), more conservative  
311 replication is preferred, and Ori-dependent pathways again dominate.

312 It seems unlikely that Archaea replicate via an iSDR mechanism, as iSDR-dependent  
313 cells are unable to form colonies in *E. coli* (Michel and Bernander, 2014). Moreover, RNaseH  
314 is intact in the studied *cdc6* or Ori mutants of Archaea (including the published *T. kodakarensis*  
315 and *H. volcanii*, and our *T. barophilus* strains), suggesting that an alternative form of DNA  
316 replication initiation may exist in Archaea. It is worth noting that  $\Delta$ Ori strains of *T.*  
317 *kodakarensis* and *H. volcanii* require the homologous recombination protein, RadA for survival  
318 (though this protein has been implicated in other functions of DNA replication). In near future  
319 more experiments should be performed to understand where and how precisely DNA replication  
320 initiate in Ori deleted strain. It is thus reasonable to propose that some form of recombination-  
321 dependent replication is responsible for chromosome replication in exponential growth phase  
322 in *Thermococcales* such as *T. kodakarensis*, *T. barophilus* or *T. sp. 5-4*, and artificially  
323 generated Cdc6/Ori mutants. This is supported by the ploidy of  $\Delta$ TbOriC strain never  
324 decreasing below three; perhaps sufficient to permit homologous recombination to start DNA  
325 replication.

326 While our work helps answer why apparently dispensable Ori are preserved in  
327 *Thermococcales*, it opens the door to further questions, such as how ploidy is regulated in  
328 Archaea, and how Ori-independent replication proceeds.

329

## 330 **Methods**

331

### 332 **Strains, media, and growth conditions**

333

334 Bacterial and archaeal strains are listed in Table S1. *E. coli* strain DH5 $\alpha$  was the general  
335 cloning host. Luria-Bertani (LB) broth was used to cultivate *E. coli*. *Thermococcales* rich  
336 medium (TRM) was used to cultivate *T. barophilus* MP, under anaerobic condition and at 85°C  
337 or at 65 and 95°C, as described in Zeng *et al.* (2009). Artificial sea water complemented by 0.5  
338 % of yeast extract and 0.5 % of tryptone (ASW-YT) was used to cultivate *T. kodakarensis* and  
339 *Thermococcus sp. 5-4*, under anaerobic conditions at 85°C, as shown in Sato *et al.* (2003).  
340 Media were supplemented with the appropriate antibiotics used at the following concentrations:  
341 ampicillin 25  $\mu\text{g.mL}^{-1}$  for *E. coli*, simvastatin 2.5  $\mu\text{g.mL}^{-1}$  and 6MP (100  $\mu\text{M}$ ) for *T. barophilus*.  
342 When necessary elemental or colloidal sulfur (0.1 % final concentration) was added for  
343 *Thermococcales*. Plating was performed by addition to the liquid medium of 16  $\text{g.L}^{-1}$  of agar  
344 for *E. coli* and 10  $\text{g.L}^{-1}$  of phytigel for *Thermococcales*.

345

### 346 **Plasmids construction**

347

348 Primers table was given in supplementary table 2. Deletion of TbOriC and *Tbcd6* was  
349 performed using pRD236 and pRD265. These plasmids were constructed using primers pair  
350 145-OriC2c-UpBamHI/250-OriC2c-FusionRv2, 148-OriC2c-DnKpnI/249-OriC2c-FusionFw2  
351 and 298-DeltaTbCdc6BamHI/299-DeltaTbCdc6Rv, 300-DeltaTbCdc6Fw/301-  
352 DeltaTbCdc6KpnI, respectively. Fragments generated by PCR were fused using primers pair  
353 145-OriC2c-UpBamHI/148-OriC2c-DnKpnI and 298-DeltaTbCdc6BamHI/301-  
354 DeltaTbCdc6KpnI, respectively. Then, these fusions were inserted into pUPH using *KpnI* and  
355 *BamHI* restriction sites.

356

### 357 **Transformation methods and strains verification**

358

359 The transformation of *T. barophilus* were performed as already described in Thiel *et al.*

360 (2014) using 0.2 to 2 µg of plasmid. Verification of the deletion was performed using 7-pGDH-  
361 IsceI-Fwnew/8-pGDH-IsceI-Rv to ensure that non-replicative plasmid used to constructed  
362 mutant did not stay in the cell and for TbOriC, *Tbcd6* mutants, primers pair outside the  
363 construction, 257-VerifTbOriC2-Fw/258-VerifTbOriC2-Rv and 302-  
364 DeltaTbCdc6VerifFw/303-DeltaTbCdc6VerifRv were used, respectively.

365

### 366 **Marker Frequency Analysis**

367

368 DNA was extracted from cultures of *Thermococcus* species at exponential or stationary  
369 phase growth (6h and 16h, respectively for *T. kodakarensis* and *T. sp. 5-4*; 6h and 24h for *T.*  
370 *barophilus*) or at different point during the growth curve for *T. barophilus* using protocols  
371 described previously (Thiel et al. 2014). Library preparation and Illumina sequencing was  
372 performed at Genoscope, France (for *T. kodakarensis* and *T. sp. 5-4*) and Eurofins, Germany or  
373 Novogene, UK (for *T. barophilus*). Read mapping was performed with Bowtie2 (Langmead  
374 and Salzberg, 2012). Normalized average number of reads per position was used to estimate  
375 relative replication initiation activity. High read counts were statistically treated as peaks and  
376 the analysis of the peak area were performed using Origin 2016 (OriginLab Corporation,  
377 Northampton, USA) with the peak analyser tool.

378

### 379 **Chromosome number determination by quantitative real-time PCR**

380 Quantitative real-PCR was performed from the different culture samples taken during  
381 the growth in triplicates of the wild strain *T. barophilus* and the mutated strain  $\Delta$ TbOriC from  
382 which the DNA was extracted. New primer set specific to *RadA* gene was designed: 539-  
383 RadAqPCRfw2 and 540-RadAqPCRRv2. Primer concentration was optimized to minimize the  
384 secondary structure formations and to maximize the reaction efficiency. Q-PCR reactions were  
385 performed in a final volume of 25 µl using PerfeCTa SYBR Green SuperMix ROX (Quanta  
386 Bioscience) on a CFX96 Touch Real-Time PCR System (Biorad), 1 ng of DNA template and  
387 800 nM primers. 40 cycles were performed including one hot-start polymerase activation cycle  
388 (95°C, 10 min) and 40 cycles of denaturation (95°C, 15 s) followed by a coupled hybridization  
389 and elongation step (60°C, 1 min). Standard curve was obtained from 10-fold serial dilutions  
390 (1000 to 109 copies) of plasmid containing RadA gene from *T. barophilus*. Each reaction was  
391 run in triplicates. The quality of qPCR runs was assessed based on melting curves and measured  
392 efficiencies; the R of standard curves generated by qPCR and efficiency of the reaction were

393 around 0.999 and 90%, respectively. qPCR results were expressed in number of chromosomes  
394 per cells.

395

#### 396 **Data access:**

397 *T. kodakarensis* and *T. sp 5-4* raw reads are available on NCBI under accession number  
398 NC\_006624 and NZ\_CP021848 respectively. *T. barophilus* raw reads are available in the  
399 European Nucleotide Archive under Bioproject accession number PRJEB40197.

400

#### 401 **Competing interest statement**

402 Authors declare no competing interest.

403

#### 404 **Acknowledgments**

405 This work was supported by Ifremer, the "Laboratoire d'Excellence" LabexMER (ANR-  
406 10-LABX-19) and co-funded by a grant from the French government under the program  
407 "Investissements d'Avenir". I want to dedicate this work to my mum, Monique Dulermo who  
408 permitted me to become a scientist.

409

#### 410 **Author Contributions:**

411

412 YM: sequencing and analysis of MFA for *T. barophilus*, writing, discussion; RC: sequencing  
413 and analysis of MFA for *T. Sp. 5-4* and *T. kodakarensis* writing, discussion; YL: discussion;  
414 EL: growth curves; LMT: growth curves; JA: Sequencing and analysis of sequences for *T.*  
415 *barophilus*; ER: growth curves; JO: discussion and funding; DF: administrative struggle to  
416 organize the night shift needed to acquire growth data, discussion, writing and funding; RD:  
417 funding, writing, design experiments and construction of plasmids and strains.

418

#### 419 **Competing Interests**

420 The authors declare that there is no conflict of interests regarding the publication of this paper.

421



422 **References**

423

424 Birien T, Thiel A, Henneke G, Flament D, Moalic Y, Jebbar M. 2018. Development of an  
425 Effective 6-Methylpurine Counterselection Marker for Genetic Manipulation in *Thermococcus*  
426 *barophilus*. *Genes (Basel)* **9**: 77.

427

428 Cossu M, Da Cunha V, Toffano-Nioche C, Forterre P, Oberto J. 2015. Comparative genomics  
429 reveals conserved positioning of essential genomic clusters in highly rearranged  
430 *Thermococcales* chromosomes. *Biochimie* **118**: 313-321.

431

432 Cossu M, Babel C, Catchpole R, Gadelle D, Marguet E, Barbe V, Forterre P, Oberto J. 2017.  
433 Flipping chromosome in deep-sea *archaea*. *PLoS genet.* **13**: e1006847. doi:  
434 10.1371/journal.pgen.1006847. eCollection 2017 Jun.

435

436 Gao F. 2015. Bacteria may have multiple replication origins. *Front. Microbiol.* **6**: 324.

437

438 Gehring AM, Astling DP, Matsumi R, Burkhart BW, Kelman Z, Reeve JN, Jones KL,  
439 Santangelo TJ. 2017. Genome Replication in *Thermococcus kodakarensis* Independent of Cdc6  
440 and an Origin of Replication. *Front. Microbiol.* **8**: 2084.

441

442 Geslin C, Le Romancer M, Erauso G, Gaillard M, Perrot G, Prieur D. 2003. PAV1, the first  
443 virus-like particle isolated from a hyperthermophilic euryarchaeote, "*Pyrococcus abyssi*". *J.*  
444 *Bact.* **185**: 3888-3894.

445

446 Hawkins M, Malla S, Blythe MJ, Nieduszynski CA, Allers T. 2013. Accelerated growth in the  
447 absence of DNA replication origins. *Nature* **503**: 544-547.

448

449 Kogoma T. 1997. Stable DNA replication: interplay between DNA replication, homologous  
450 recombination, and transcription. *Microbiol. Mol. Biol. Rev.* **61**: 212-238.

451

452 Kreuzer KN, Brister J R. 2010. Initiation of bacteriophage T4 DNA replication and replication  
453 fork dynamics: a review in the *Virology Journal* series on bacteriophage T4 and its relatives.  
454 *Viol. J.* **7**: 358.

455

- 456 Langmead B, Salzberg SL. 2012. Fast gapped-read alignment with bowtie 2. *Nat. methods* **9**:  
457 357-359.
- 458
- 459 Leonard AC, Méchali M. 2013. DNA replication origins. *Cold Spring Harb. Perspect. Biol.* **5**:  
460 a010116.
- 461
- 462 Ludt K, Soppa J. 2018. The influence of Origin Recognition Complex (ORC) proteins on the  
463 copy numbers of three chromosomes in *Haloferax volcanii*. *J. Bact.* **25**: e00161-18. doi:  
464 10.1128/JB.00161-18.
- 465
- 466 Lundgren M, Andersson A, Chen L, Nilsson P, Bernander R. 2004. Three replication origins in  
467 *Sulfolobus* species: synchronous initiation of chromosome replication and asynchronous  
468 termination. *Proc. Natl. Acad. Sci. USA* **101**: 7046-7051.
- 469
- 470 Luo H, Zhang CT, Gao F. 2014. Ori-Finder 2, an integrated tool to predict replication origins  
471 in the archaeal genomes. *Front. Microbiol.* **5**: 482.
- 472
- 473 Marteinson VT, Birrien JL, Reysenbach AL, Vernet M, Marie D, Gambacorta A, Messner P,  
474 Sleytr UB, Prieur D. 1999. *Thermococcus barophilus* sp. nov., a new barophilic and  
475 hyperthermophilic archaeon isolated under high hydrostatic pressure from a deep-sea  
476 hydrothermal vent. *Int J Syst Bacteriol.* **49**: 351-359.
- 477
- 478
- 479 Matsunaga F, Glatigny A, Mucchielli-Giorgi MH, Agier N, Delacroix H, Marisa L, Durosay P,  
480 Ishino Y, Aggerbeck L, Forterre P. 2007. Genomewide and biochemical analyses of DNA-  
481 binding activity of Cdc6/Orc1 and Mcm proteins in *Pyrococcus* sp. *Nucleic Acids Res.* **35**:  
482 3214-3222.
- 483
- 484 Michel B, Bernander R. 2014. Chromosome replication origins: do we really need them?  
485 *Bioessays* **36**: 585-590.
- 486
- 487 Myllykallio H, Lopez P, López-García P, Heilig R, Saurin W, Zivanovic Y, Philippe H, Forterre  
488 P. 2000. Bacterial mode of replication with eukaryotic-like machinery in a hyperthermophilic  
489 archaeon. *Science* **288**: 2212-2215.

490  
491 Ohbayashi R, Watanabe S, Ehira S, Kanasaki Y, Chibazakura T, Yoshikawa H. 2016.  
492 Diversification of *DnaA* dependency for DNA replication in cyanobacterial evolution. ISME J.  
493 **10**: 1113-1121.  
494  
495 Ojha KK, Swati D. 2010. Mapping of origin of replication in *Thermococcales*. Bioinformatics  
496 **5**: 213-218.  
497  
498 Pelve EA, Lindås AC, Knöppel A, Mira A, Bernander R. 2012. Four chromosome replication  
499 origins in the archaeon *Pyrobaculum calidifontis*. Mol. Mic. **85**: 986-995  
500  
501 Pelve EA, Martens-Habbena W, Stahl DA, Bernander R. 2013. Mapping of active replication  
502 origins in vivo in thaum- and euryarchaeal replicons. Mol. Mic. **90**: 538-550.  
503  
504 Robinson NP, Dionne I, Lundgren M, Marsh VL, Bernander R, Bell SD. 2004. Identification  
505 of two origins of replication in the single chromosome of the archaeon *Sulfolobus solfataricus*.  
506 Cell **116**: 25-38.  
507  
508 Ruiz-Masó JA, Machón C, Bordanaba-Ruiseco L, Espinosa M, Coll M, Del Solar G. 2015.  
509 Plasmid Rolling-Circle Replication. Microbiol. Spectr. **3**: PLAS-0035-2014. doi:  
510 10.1128/microbiolspec.PLAS-0035-2014.  
511  
512 Sato T, Fukui T, Atomi H, Imanaka T. 2003. Targeted gene disruption by homologous  
513 recombination in the hyperthermophilic archaeon *Thermococcus kodakaraensis* KOD1. J.  
514 Bacteriol. **185**: 210-220.  
515  
516 Spaans SK, van der Oost J, Kengen SW. 2015. The chromosome copy number of the  
517 hyperthermophilic archeon *Thermococcus kodakarensis* KOD1. Extremophiles **19**: 741-750.  
518  
519 Thiel A, Michoud G, Moalic Y, Flament D, Jebbar M. 2014. Genetic manipulations of the  
520 hyperthermophilic piezophilic archaeon *Thermococcus barophilus*. Appl. Environ. Microbiol.  
521 **80**: 2299-2306.  
522

- 523 Yang H, Wu Z, Liu J, Liu X, Wang L, Cai S, Xiang H. 2015. Activation of a dormant replication  
524 origin is essential for *Haloferax mediterranei* lacking the primary origins. Nat. Commun. **6**:  
525 8321.  
526
- 527 Zeng X, Birrien JL, Fouquet Y, Cherkashov G, Jebbar M, Querellou J, Oger P, Cambon-  
528 Bonavita MA, Xiao X, Prieur D. 2009. *Pyrococcus* CH1, an obligate piezophilic  
529 hyperthermophile: Extending the upper pressure-temperature limits for life. ISME J., **3**: 873–  
530 876
